# Supplementary material for: Changes in T Cell and Dendritic Cell Phenotype from Mid to Late Pregnancy Are Indicative of a Shift from Immune Tolerance to Immune Activation
Source: PubMed Central journal article supplement (PMC5605754; doi:10.3389/fimmu.2017.01138), 2017-09-15
Supplement: image_1.pdf [file image_1.pdf]

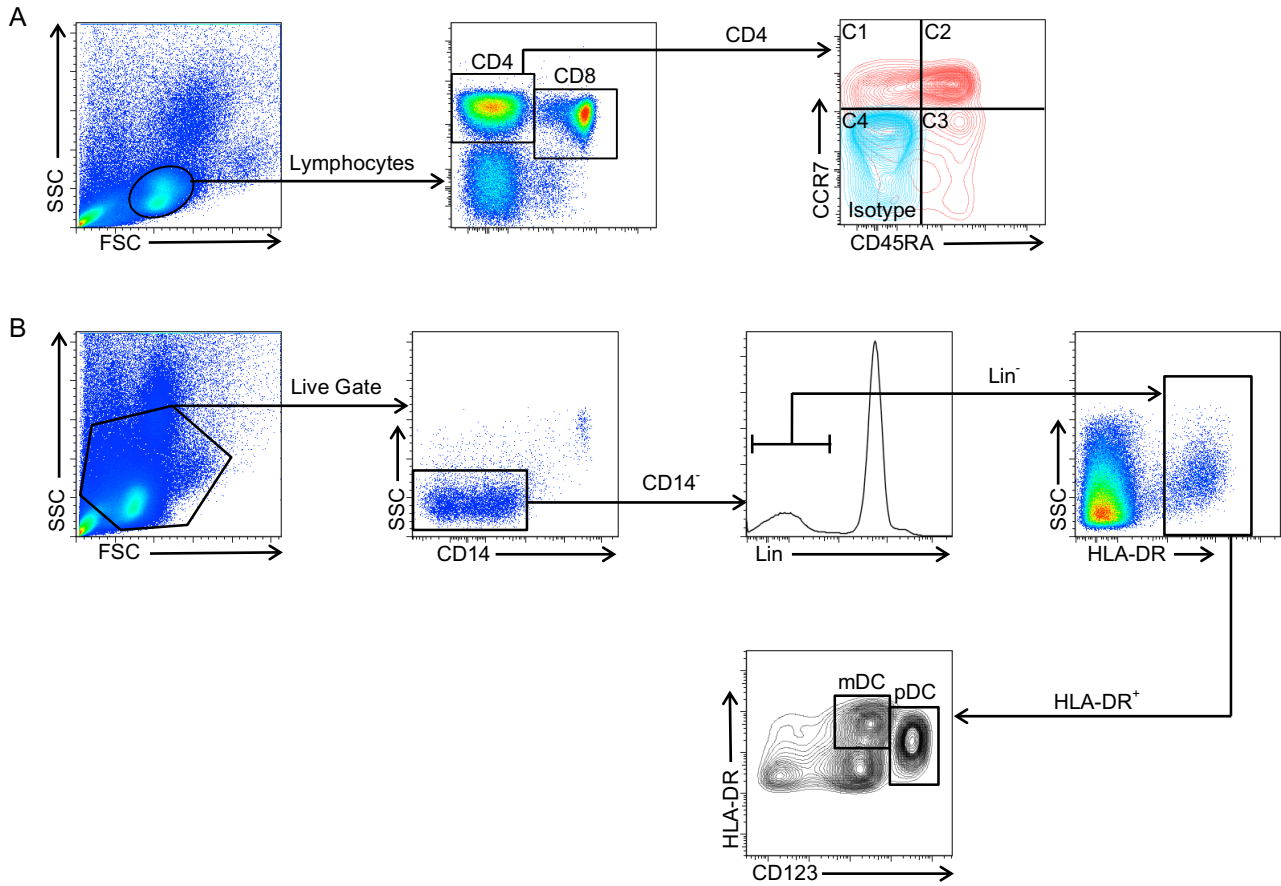

Supplemental Figure 1. (A) Flow cytometry plots showing the gating strategy used to identify  $T_{CM}$  (C1), naïve (C2),  $T_{TEMRA}$  (C3) and  $T_{EM}$  (C4) CD4 lymphocytes. (B) Flow cytometry plots and histograms showing the gating strategy used to identify mDC ( $CD14^{-}Lin^{-}HLA-DR^{hi}CD123^{-}$ ) and pDC ( $CD14^{-}Lin^{-}HLA-DR^{+}CD123^{+}$ ).
